# Supplementary material for: Thin-Layer-Agar-Based Direct Phenotypic Drug Susceptibility Testing on Sputum in Eswatini Rapidly Detects Mycobacterium tuberculosis Growth and Rifampicin Resistance Otherwise Missed by WHO-Endorsed Diagnostic Tests
Source: PubMed Central journal article supplement (PMC8315964; doi:10.1128/aac.02263-20), 2021-05-18
Supplement: aac.02263-20-s0001.pdf [file aac.02263-20-s0001.pdf]

Table S1 Results for six isolates classified as administrative errors

| WGS         |               | Xpert<br>MTB/RIF | MDRTB<br>plus | TLA DST (µg/ml) |            | LJ-DST (µg/ml) |            | LJ-MIC<br>RMP<br>(µg/ml) | MGIT-DST<br>RMP |
|-------------|---------------|------------------|---------------|-----------------|------------|----------------|------------|--------------------------|-----------------|
| <i>rpoB</i> | <i>gyrA/B</i> |                  |               | RMP<br>1.0      | OFX<br>2.0 | RMP<br>40      | OFX<br>2.0 |                          |                 |
| I491F       | WT            | R                | nd            | R               | S          | R              | na         | na                       | na              |
| S450L       | WT            | S                | delWT,MUT3    | R               | S          | R              | na         | 160                      | R               |
| H445L       | WT            | S                | WT            | S               | S          | R              | S          | 160                      | R               |
| WT          | WT            | S                | WT            | S               | S          | R              | R          | 20                       | S               |

GS=whole genome sequencing; Xpert=Xpert®MTB/RIF; LJ=Löwenstein-Jensen; TLA=thin layer agar; RMP=rifampicin; MIC=minimal inhibitory concentration; MGIT=mycobacterial growth indicator tube; na= not available; DST=drug susceptibility testing

In the first isolate a non-RRDR mutation, I491F, was identified through WGS and identified as RR by Xpert®MTB/RIF, which theoretically is not possible.

In the second isolate WGS showed the presence of S450L, a high confidence mutation, but it was missed by Xpert®MTB/RIF.

The third isolate carried the H445L mutation, unexpectedly missed by rapid molecular techniques.

The fourth isolate, WT by WGS for *rpoB* was RMP-R by LJ-DST. The isolate was also discordant for OFX 2.0µg/ml.
